# Supplementary material for: The Faculty Costs to Educate a Biomedical Sciences Graduate Student
Source: Atypon-hosted journal article supplement (doi:10.1187/cbe.14-06-0106), 2015-03-02
Supplement: combinedsupmats.pdf [file combinedsupmats.pdf]

# Supplemental Material

*CBE—Life Sciences Education*

Smolka *et al.*

# Graduate Education Effort Survey

The College of Graduate Studies Teaching Support Committee is charged with determining the cost of teaching graduate students. This survey seeks to acquire data that will allow informed assessment of proposed graduate teaching reimbursement systems. Your participation is important; please respond as accurately as possible and submit by Friday 20th January, 2012.

Please be assured that all survey responses are collected anonymously.

Thank you!

---



---

## General Information

- 1.0 Which Graduate Studies Program are you affiliated with?
- Biochemistry and Molecular Biology
  - Biostatistics and Epidemiology
  - Cell and Molecular Pharmacology and Experimental Therapeutics
  - Regenerative Medicine and Cell Biology
  - Microbiology and Immunology
  - Molecular and Cellular Biology and Pathobiology
  - Neurosciences
  - Pathology and Laboratory Medicine
  - Pharmaceutical and Biomedical Sciences
- 2.0 What is your academic rank?
- Professor
  - Associate Professor
  - Assistant Professor
  - Instructor
  - Other
- 2.1 Please describe your rank (clinical, research, adjunct, etc).
- \_\_\_\_\_
- 3.0 What is your terminal degree?
- PhD
  - MD
  - DSc
  - DDS
  - PharmD
  - MD, PhD
  - DDS, PhD
  - Other
- 3.1 What is your degree?
- \_\_\_\_\_

---



---

## Graduate Studies Course Directing in the 2010-2011 Academic Year.

**Do not include 900 level courses (dissertation/research) or Lab Rotations.**

- 4.0 Were you a Graduate Studies course director and/or a First Year Curriculum (FYC) Unit leader?
- Yes
  - No

4.1 How many Graduate Studies courses and/or FYC Units did you direct?

- 1
- 2
- 3
- 4
- 5
- 6
- 7
- 8
- 9
- 10

411a What was the first course number? (e.g. BMB605)  
(Answer is optional)

---

411b How many credit hours? (All FYC Units are 2 credit hours)

---

411c For this course, how many hours did you spend on course director activities other than teaching? This includes schedule planning, lecture attendance, student interactions, assignment and exam preparation, grading, grade reporting, etc.

---

412a What was the second course number? (Answer is optional)

---

412b How many credit hours?

---

412c For this course, how many hours did you spend on course director activities other than teaching?

---

413a What was the third course number? (Answer is optional)

---

413b How many credit hours?

---

413c For this course, how many hours did you spend on course director activities other than teaching?

---

414a What was the fourth course number? (Answer is optional)

---

414b How many credit hours?

---

414c For this course, how many hours did you spend on course director activities other than teaching?

---

415a What was the fifth course number? (Answer is optional)

---

415b How many credit hours?

---

415c For this course, how many hours did you spend on course director activities other than teaching?

---

416a What was the sixth course number? (Answer is optional)

---

416b How many credit hours?

---

416c For this course, how many hours did you spend on course director activities other than teaching?

---

417a What was the seventh course number? (Answer is optional)

---

417b How many credit hours?

---

417c For this course, how many hours did you spend on course director activities other than teaching?

---

- 418a What was the eight course number? (Answer is optional) \_\_\_\_\_
- 418b How many credit hours? \_\_\_\_\_
- 418c For this course, how many hours did you spend on course director activities other than teaching? \_\_\_\_\_
- 419a What was the ninth course number? (Answer is optional) \_\_\_\_\_
- 419b How many credit hours? \_\_\_\_\_
- 419c For this course, how many hours did you spend on course director activities other than teaching? \_\_\_\_\_
- 4110 What was the tenth course number? (Answer is optional) \_\_\_\_\_
- 4110 How many credit hours? \_\_\_\_\_
- 4110 For this course, how many hours did you spend on course director activities other than teaching? \_\_\_\_\_

---



---

### Graduate Studies Teaching in the 2010-2011 Academic Year.

**Do not include 900 level courses (dissertation/research) or Lab Rotations.**

- 5.0 Did you teach in a Graduate Studies course?  Yes  
 No
- 5.1 How many hours (contact hours) did you teach? \_\_\_\_\_
- 5.2 For each contact hour, how many hours on average did you spend on lecture preparation or other activities related to teaching? (composing and grading tests, etc) \_\_\_\_\_

---



---

### Graduate Studies Mentoring in the 2010-2011 Academic Year.

**Include 900 level courses (dissertation/research) and Lab Rotations.**

- 6.0 Were you the primary mentor or co-mentor for one or more PhD, MS or MD/PhD students?  Yes  
 No
- 6.1 How many students did you mentor? \_\_\_\_\_
- 6.2 How many hours on average did you spend mentoring per student per week? \_\_\_\_\_
- 6.3 How many hours on average per year do you spend on your student(s) committee meetings, written and oral exams, and on thesis/dissertation defense(s)? \_\_\_\_\_
- 7.0 Did you have any Lab Rotation students?  Yes  
 No
- 7.1 How many? \_\_\_\_\_
- 7.2 How many hours on average did you spend mentoring Lab Rotation student(s) during one rotation? \_\_\_\_\_

8.0 Did you serve on a Graduate Studies thesis or dissertation committee for another mentor's student(s)?

Yes

No

8.1 How many hours did you spend on those committee meetings, written and oral exams, and thesis/dissertation defense(s) during the academic year?

---
